# Supplementary material for: Intracellular Toxic Advanced Glycation End-Products in 1.4E7 Cell Line Induce Death with Reduction of Microtubule-Associated Protein 1 Light Chain 3 and p62
Source: MDPI journal article supplement (doi:10.3390/nu14020332), 2022-01-13
Supplement: s1 [file s1]

## Supplementary Materials

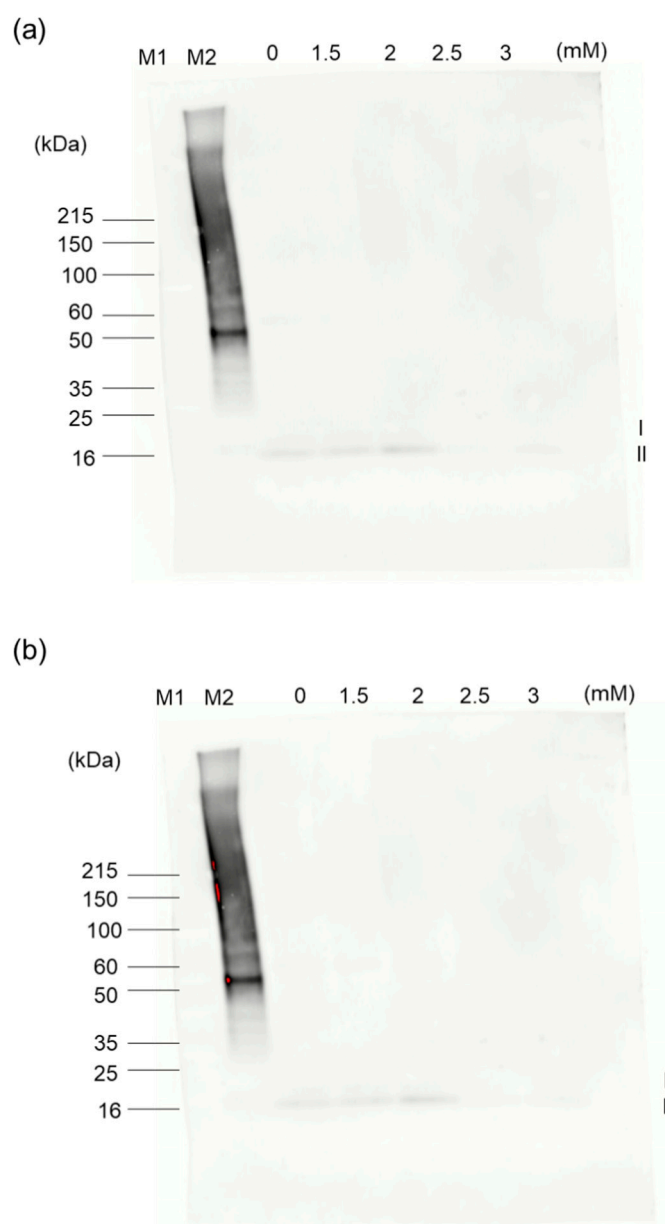

**Figure S1.** Full-length blots of the LC3 image presented in Figure 2a. Image was obtained following a short exposure time under chemilumi mode. GA: glyceraldehyde. **(a)** The band of LC3 was detected on a polyvinylidene difluoride (PVDF) membrane with full sensitivity and 20 s expose. **(b)** The band of LC3 was detected on a PVDF membrane with full sensitivity and 60 s expose. **(a,b)** M1: molecular weight size marker can be to observed under visible light in this lane. M2: HRP-linked molecular weight size marker was loaded in this lane. Molecular weights are indicated by the marker in M2. I and II show the LC3-I and -II position.

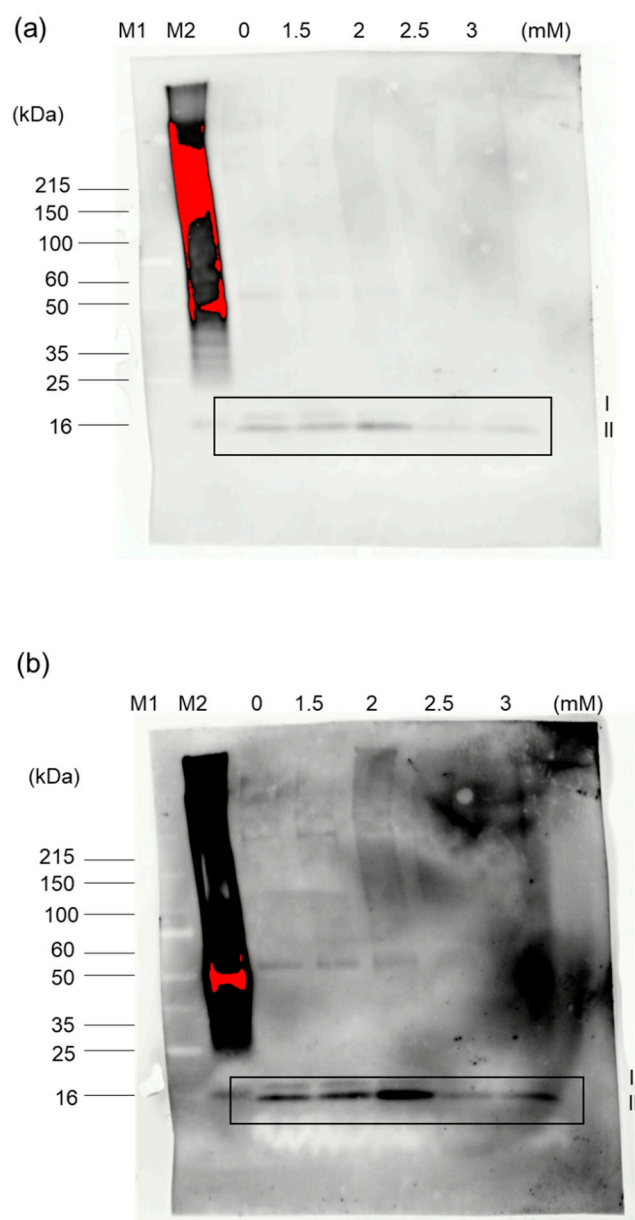

**Figure S2.** Full-length blots of the LC3 image presented in Figure 2a, which was obtained following a long exposure duration with chemilumi mode. GA: glyceraldehyde. (a) The band of LC3 was detected on the PVDF membrane with full sensitivity and 240 s expose. (b) The band of LC3 was detected on the PVDF membrane with full sensitivity and 120 s expose, and the value of the gray scale was 5000 in Fusion FX software. (a,b) M1: molecular weight marker can be observed under visible light in this lane. M2: HRP-linked molecular weight marker was loaded in this lane. The molecular weights are indicated by the marker in M2. I and II show the LC3-I and -II position. The open box replaces the LC3-I and -II bands indicated in Figure 2a.

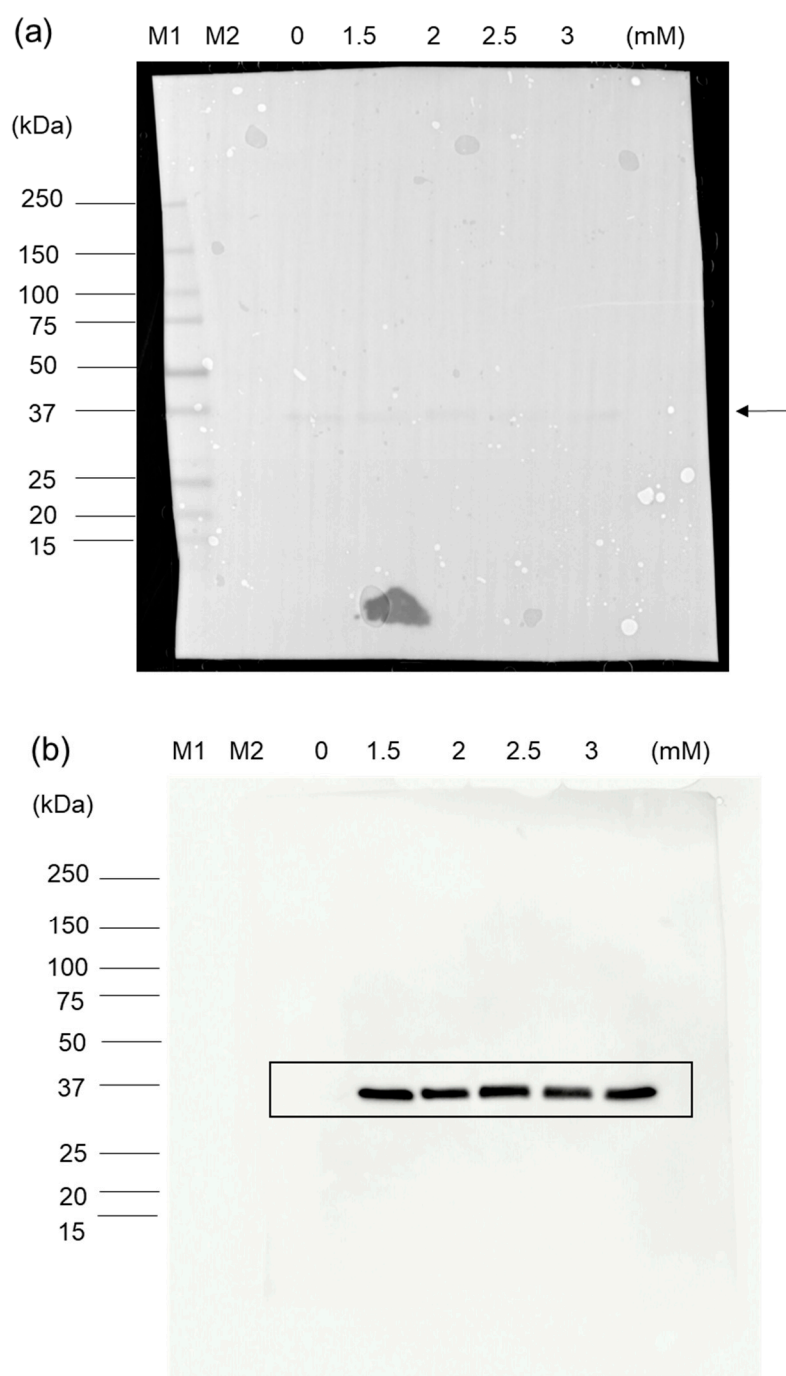

**Figure S3.** Full-length blots of the GAPDH image presented in Figure 2a. GA: glyceraldehyde. **(a)** The PVDF membrane was exposed for 480 ms in White Epi mode. The arrow indicates the position of the compound obtained using an anti-GAPDH antibody, a secondary antibody, and reagents of the ImmunoStar LD kit. **(b)** The band of GAPDH was detected on the PVDF membrane under chemilumi mode. The open box replaces the GAPDH bands indicated in Figure 2a. **(a,b)** M1: molecular weight marker that can be observed under visible light is shown in this lane. M2: HRP-linked molecular weight marker was loaded in this lane. The molecular weights are indicated by the marker in M1.

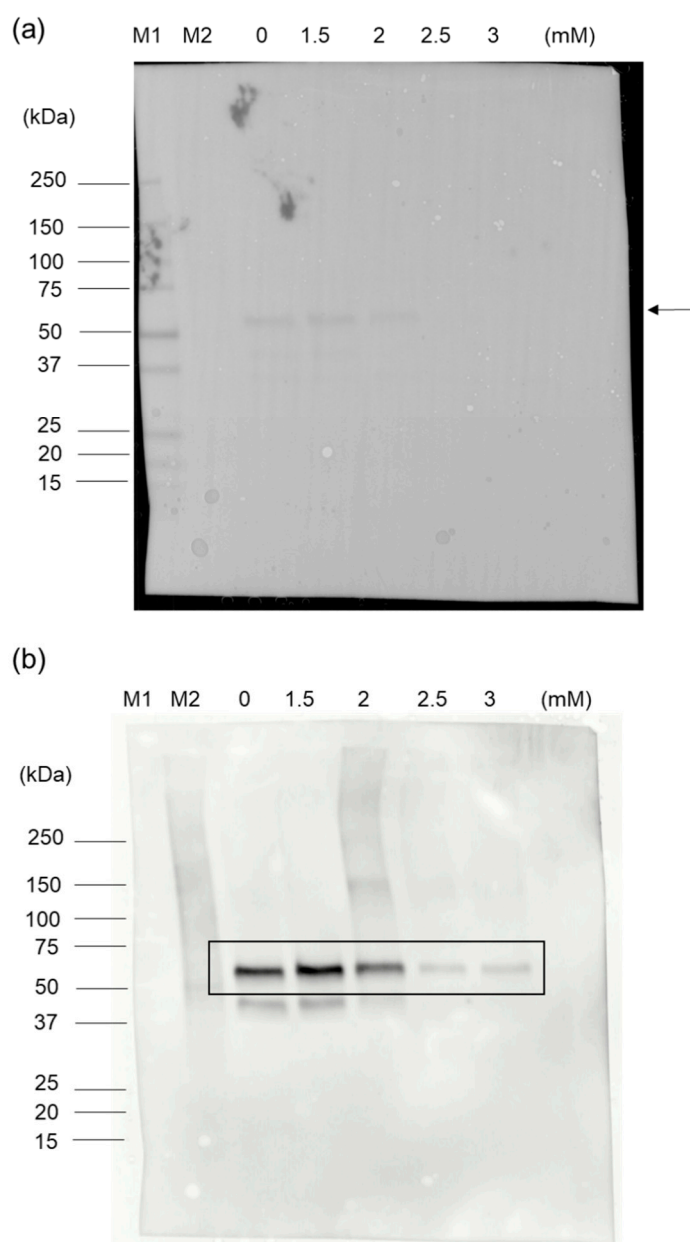

**Figure S4.** Full-length blots of the p62 images presented in Figure 2a. GA: glyceraldehyde. **(a)** The PVDF membrane was exposed for 480 ms in White Epi mode. The arrow indicates the position of the compound obtained using an anti-p62 antibody, a secondary antibody, and reagents of the ImmunoStar LD kit. **(b)** The band of GAPDH band was detected on the PVDF membrane in chemilumi mode. The open box replaces the p62 bands indicated in Figure 2a. **(a,b)** M1: molecular weight marker can be observed under visible light in this lane. M2: HRP-linked molecular weight marker was loaded in this lane. The molecular weights are indicated by the marker in M1.

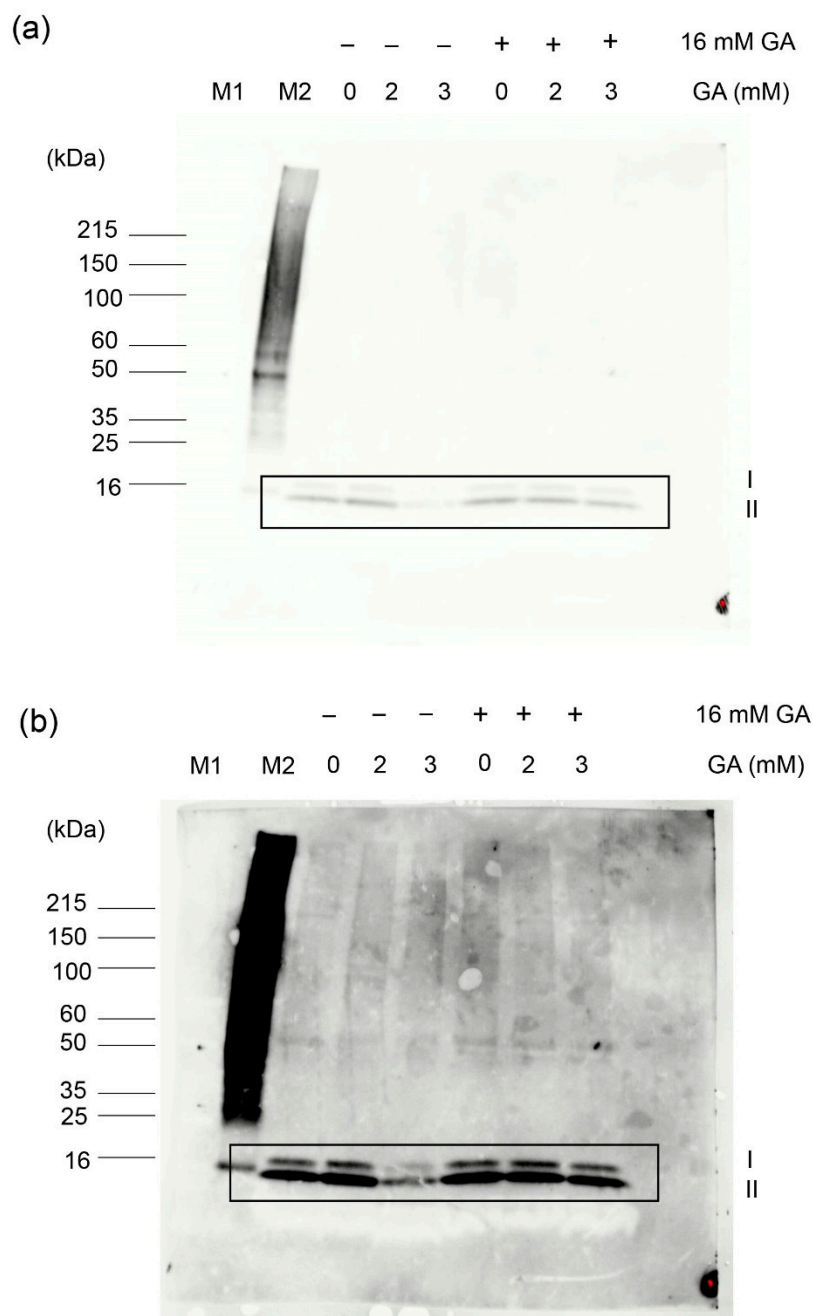

**Figure S5.** Full-length blots of the LC3 image in Figure 3a, which was obtained following exposure for in chemilumi mode. GA: glyceraldehyde. Ag: aminoguanidine (a) The LC3 band was detected on the PVDF membrane with full sensitivity and 120 s expose. (b) The LC3 band was detected on the PVDF membrane with full sensitivity and 120 s expose, and the value of the gray scale was 10,000 in the Fusion FX software. (a,b) M1: molecular weight can be observed under visible light in this lane. M2: HRP-linked molecular weight marker was loaded in this lane. The molecular weights are based on the marker in M1. I and II show the LC3-I and -II position. The open box replaces the LC3-I and -II bands indicated in Figure 2a. The molecular weights are based on the marker size in M2.

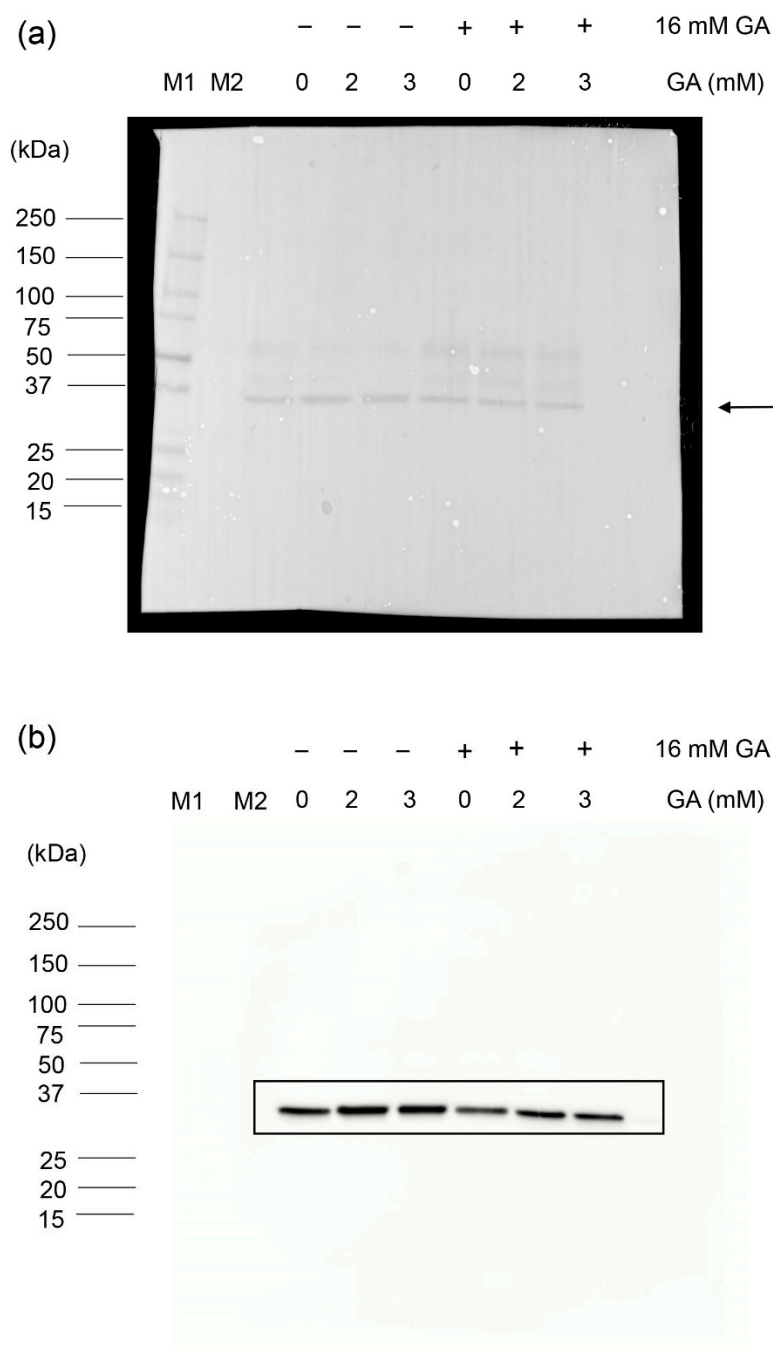

**Figure S6.** Full-length blots of GAPDH image presented in Figure 3a. GA: glyceraldehyde. AG: aminoguanidine (a) The PVDF membrane was exposed for 480 ms in White Epi mode. The arrow indicates the position of the band obtained with an anti-GAPDH antibody, a secondary antibody, and reagents of ImmunosterLD kit. (b) The band of GAPDH was detected on the PVDF membrane with chemilumi mode. The open box replaces the GAPDH bands indicated on Figure 3a. (a,b) M1: molecular weight marker can be observed under visible light in this lane. M2: HRP-linked molecular weight marker was loaded in this lane. The molecular weights are based on the marker in M1.

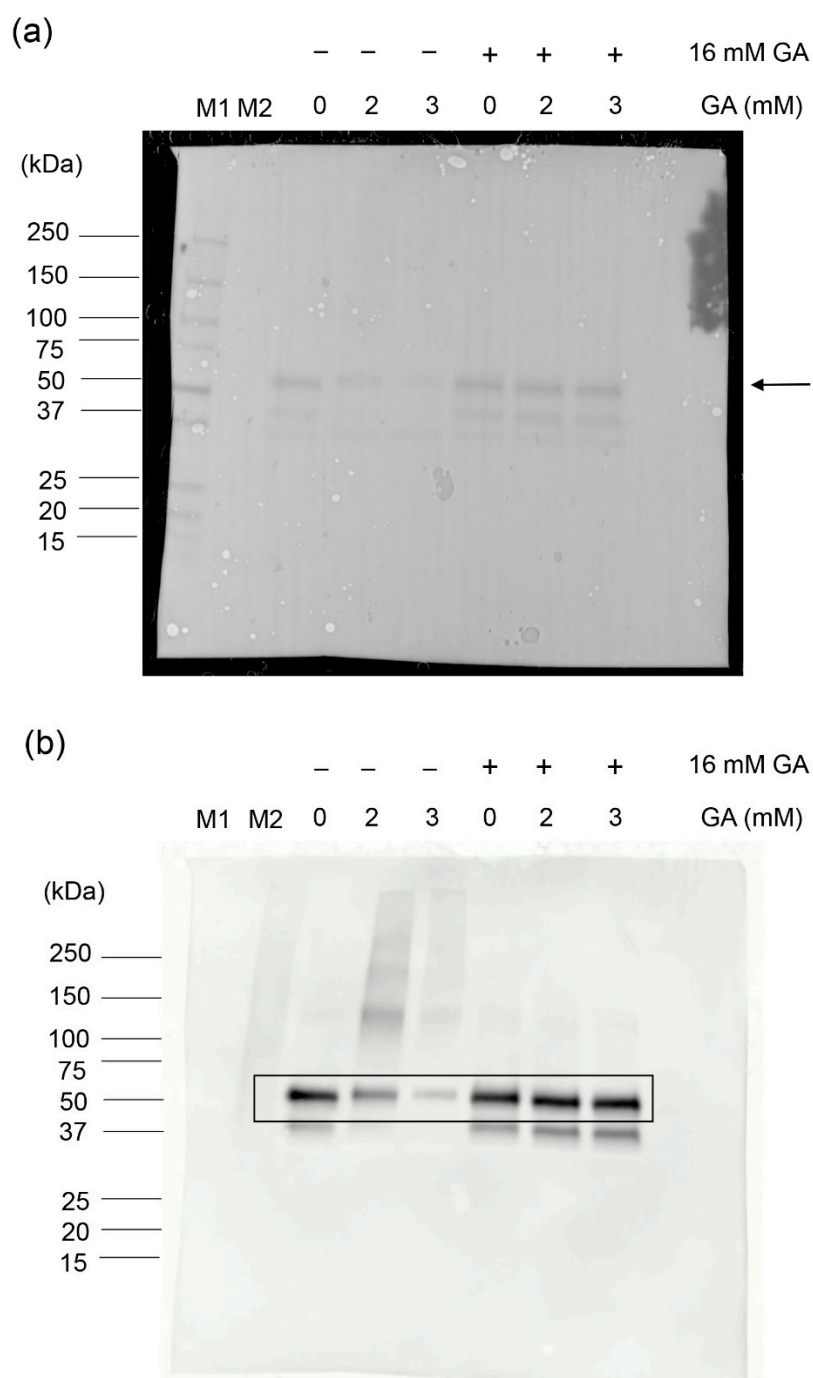

**Figure S7.** Full-length blots of the p62 image presented in Figure 3a. GA: glyceraldehyde. AG: aminoguanidine (a) The PVDF membrane was exposed for 480 ms in White Epi mode. The arrow indicates the position of the band generated by an anti-p62 antibody, a secondary antibody, and reagents of the ImmunoStar LD kit. (b) A band p62 was detected on the PVDF membrane under chemiluminescence mode. The open box replaces the p62 bands indicated in Figure 3a. (a,b) M1: molecular weight marker can be observed under visible light in this lane. M2: HRP-linked molecular weight marker was loaded in this lane. The molecular weights are located based on the marker in M1.
